# Supplementary material for: A one-year cost–utility analysis of REBOA versus RTACC for non-compressible torso haemorrhage
Source: PubMed Central journal article supplement — Trauma. 2017 Nov 24;21(1):45–54. doi: 10.1177/1460408617738810 (PMC6380757; doi:10.1177/1460408617738810), 2017-11-24
Supplement: supplementary_material.pdf [file supplementary_material.pdf]

## Supplementary Information:

### Methodology

#### *REBOA and RTACC Studies*

Table S1: Overview of studies used to calculate REBOA outcomes

| Reference                 | Location  | Population size | RBC Units (Mean) | ISS       | Mean Age | Mortality (%) | Complication                                              |
|---------------------------|-----------|-----------------|------------------|-----------|----------|---------------|-----------------------------------------------------------|
| Low <sup>1</sup>          | Unknown   | 15              | N/A              | N/A       | N/A      | 13/15 (87)    | None                                                      |
| Wolf & Berry <sup>2</sup> | USA       | 1               | 12               | N/A       | 43       | 0/1 (0)       | None                                                      |
| Gupta <sup>3</sup>        | USA       | 21              | N/A              | N/A       | 25       | 14/21 (67)    | Thrombosis (1 patient)                                    |
| Matsuoka <sup>4</sup>     | Japan     | 1               | N/A              | N/A       | 47       | 0/1 (0)       | None                                                      |
| Martinelli <sup>5</sup>   | France    | 13              | 19               | 48        | 42       | 7/13 (54)     | Thrombosis (2 patients)                                   |
| Brenner <sup>6</sup>      | USA       | 6               | N/A              | 33.8<br>3 | 39.5     | 2/6 (33)      | None                                                      |
| Ogura <sup>7</sup>        | Japan     | 7               | 12               | 50        | 62       | 1/7 (14)      | None                                                      |
| Irahara <sup>8</sup>      | Japan     | 14              | 28.8             | 29.5      | 46.9     | 9/14 (64)     | Acute kidney injury (1 patient)                           |
|                           |           |                 |                  |           |          |               |                                                           |
| Norii <sup>9</sup>        | USA/Japan | 452             | N/A              | 35.6      | 51.5     | 343/452 (76)  | Unknown                                                   |
| Saito <sup>10</sup>       | Japan     | 24              | 15.6             | 47        | 59       | 17/24 (71)    | Acute kidney injury (9 patients), Amputation (2 patients) |
| Moore <sup>11</sup>       | USA       | 24              | N/A              | N/A       | 41       | 15/24 (63)    | None                                                      |
| DuBose <sup>12</sup>      | USA       | 46              | 20.5             | 31        | 43.2     | 33/46 (72)    | Pneumonia (2), DVT (2), Sepsis (3), Dialysis (2)          |

Table S2: Overview of studies used to calculate RTACC outcomes

| Reference                          | Location     | Population size | RBC units (Mean) | ISS  | Mean age | Mortality (%) | Complications                    |
|------------------------------------|--------------|-----------------|------------------|------|----------|---------------|----------------------------------|
| Branney <sup>13</sup>              | USA          | 124             | N/A              | N/A  | 30       | 115/124 (92)  | 1 NI                             |
| Velmahos <sup>14</sup>             | South Africa | 118             | N/A              | N/A  | N/A      | 110/118 (93)  | N/A                              |
| Durham <sup>15</sup>               | USA          | 124             | N/A              | N/A  | N/A      | 119/124 (96)  | N/A                              |
| Ivatory <sup>16</sup>              | USA          | 19              | N/A              | N/A  | N/A      | 19/19 (100)   | N/A                              |
| Feliciano <sup>17</sup>            | USA          | 185             | N/A              | N/A  | N/A      | 180/185 (97)  | N/A                              |
| Schwab <sup>18</sup>               | UK           | 31              | N/A              | N/A  | N/A      | 30/31 (97)    | N/A                              |
| Danne <sup>19</sup>                | USA          | 6               | N/A              | N/A  | 35.5     | 7/8 (88)      | 1 Empyema                        |
| Vij <sup>20</sup>                  | USA          | 2               | N/A              | N/A  | n/a      | 2/2 (100)     | N/A                              |
| Flynn <sup>21</sup>                | USA          | 6               | N/A              | N/A  | n/a      | 6/6 (100)     | N/A                              |
| MacDonald <sup>22</sup>            | USA          | 9               | N/A              | N/A  | n/a      | 9/9 (100)     | N/A                              |
| Millikan <sup>23</sup>             | USA          | 39              | 17               | n/a  | 30.8     | 12/17 (71)    | 1 Pneumothorax                   |
| Van waes <sup>24</sup>             | Netherlands  | 56              | N/A              | 25   | 32       | 20/56 (36)    | 2 Reop, 1 NI                     |
| Lorenz <sup>25</sup>               | USA          | 463             | 9                | 34   | 35       | 402/463 (87)  | 5 Reop + 3 NI                    |
| Abe <sup>26</sup>                  | Japan        | 367             | N/A              | 34   | 56.7     | 355/367 (97)  | N/A                              |
| Seamon et al. (AAST) <sup>27</sup> | global       | 856             | N/A              | N/A  | N/A      | 796/856 (93)  | 8 NI                             |
| DuBose <sup>12</sup>               | global       | 68              | 20               | 31.5 | 40.8     | 55/68 (81)    | 2 Infection, 1 Haemothorax. 9 NI |
| Brautigan <sup>28</sup>            | Unknown      | 47              | N/A              | N/A  | N/A      | 34/47 (72)    | 5 NI                             |
| Seamon <sup>29</sup>               | USA          | 50              | 28.6             | 39.4 | N/A      | 42/50 (84)    | N/A                              |
| Seamon EDT surv. <sup>30</sup>     | USA          | 37              | N/A              | N/A  | N/A      | 30/37 (81)    | N/A                              |
| Ledgerwood <sup>31</sup>           | USA          | 40              | N/A              | N/A  | 32       | 34/40 (85)    | 1 Sepsis                         |

NI - Neurological impairment

### *Mortality and Quality of Life of complications*

As explained in the search strategy in the main body, the RTACC and REBOA papers did not contain sufficient data regarding complications to generate a cost-utility analysis so data regarding mortality, costs and utility for those complications reported in the RTACC/REBOA papers was identified from the following studies.

Table S3: Studies from which relevant mortality and utility values for complications were obtained

| <b>Reference</b>         | <b>Location</b>   | <b>Population</b> | <b>Complication studied</b>                    | <b>Mortality</b> | <b>Utility (EQ-5D)</b> |
|--------------------------|-------------------|-------------------|------------------------------------------------|------------------|------------------------|
| Sprengers <sup>32</sup>  | Netherlands       | 47                | Limb ischaemia/Thrombosis                      | N/A              | 0.34                   |
| Lyaker <sup>33</sup>     | USA               | N/A               | Limb Ischaemia/Thrombosis                      | 4-15%            | N/A                    |
| Galanaud <sup>34</sup>   | Germany           | 1643              | DVT                                            | 4.4%             | N/A                    |
| Tennvall <sup>35</sup>   | Sweden            | 310               | Major lower limb amputation                    | N/A              | 0.31                   |
| Fortington <sup>36</sup> | Unknown           | 299               | Major lower limb amputation                    | 32.5%            | N/A                    |
| Fagon <sup>37</sup>      | France            | 1978              | Pneumonia in ICU                               | 52.4%            | N/A                    |
| Ringburg <sup>38</sup>   | Netherlands       | 246               | Major trauma                                   | N/A              | 0.73                   |
| Campbell <sup>39</sup>   | UK                | 441               | Length of stay after major trauma and bleeding | N/A              | N/A                    |
| Xie <sup>40</sup>        | USA               | 1040              | Neurological impairment                        | N/A              | 0.69                   |
| Korosec <sup>41</sup>    | Slovenia          | 164               | Sepsis                                         | N/A              | 0.717                  |
| Granja <sup>42</sup>     | Portugal          | 305               | Sepsis                                         | 34%              | N/A                    |
| Griffith <sup>43</sup>   | USA               | 90                | Haemothorax                                    | 2.2%             | N/A                    |
| Yoon <sup>44</sup>       | Unknown           | 370               | Pneumothorax                                   | 3.3%             | N/A                    |
| Sogaard <sup>45</sup>    | Denmark           | 1,841             | Empyema                                        | 10%              | N/A                    |
| Morris <sup>46</sup>     | USA               | 78                | Dialysis                                       | 57%              | N/A                    |
| Nisula <sup>47</sup>     | Finland/Australia | 635               | Acute Kidney Injury                            | 35.3%            | N/A                    |
| NICE <sup>48</sup>       | UK                | N/A               | Cost of Red Blood Cells                        | N/A              | N/A                    |

## REBOA Probabilities

Probability at the exit of each chance node adds up to 1. The sources used to calculate probabilities are listed in Table S1.

### Chance node A

- Node A1 “Definitive Intervention”: Of the 625 patients in the studies analysed who received REBOA, 558 survived to definitive procedure, either surgery or angioembolization or both. Probability is  $558/(625-14+15)$ : 0.936.
- Node A2 “Death”: 67 patients died before receiving any definitive intervention. Probability is thus  $1-0.936 = 0.064$ .

### Chance Nodes B

- B1 “Survive”: From the studies analysed, 164 of 558 patients survived the definitive procedure, a probability of 0.29390681.
- B2 “Dead”: Probability of death was obtained by subtracting 1 from the probability of surviving.

### Chance Nodes C

After surviving the definitive intervention, patients are admitted to intensive care. It was assumed that everyone received the same level of care and this was derived from Campbell et al.<sup>39</sup> The only complications considered were for those who survived to discharge as it was assumed that patients died prior to having the time to develop them. The studies analysed mentioned a number of complications related to the procedure and the level of care required. Some patients did not have any complications. No patient sustained any neurological impairment as a result of the procedure in the available literature. All studies commented on the presence or absence of all complications reported. Importantly, Norii et al.<sup>9</sup>, by far the largest study analysed, did not report on complications therefore this patient dataset was excluded. Data for complications was available for only 55 patients of the total thereby limiting the quality of the analysis.

- C1 “Pneumonia”: DuBose et al.<sup>12</sup> reported 2 patients with pneumonia
- C2 “Acute Kidney Injury”: Saito et al.<sup>10</sup> and Irihara et al.<sup>8</sup> reported a total of 10 cases of acute kidney injury from which total recovery occurred
- C3 “Leg Amputation”: 3 amputations were reported in Saito et al.<sup>10</sup> resulting from the use of REBOA. Many studies had amputation as one of the consequences of the injuries sustained.
- C4 “Sepsis”: Sepsis was reported in 3 patients by DuBose et al.<sup>12</sup>
- C5 “Thrombosis”: Thrombosis leading to critical leg ischaemia requiring thrombectomy was reported in Martinelli et al.<sup>5</sup> and Gupta et al.<sup>3</sup> in a total of 3 patients.
- C6 “No Complication”: Patients who did not sustain any of the complications mentioned in this node were 30. This was obtained by subtracting those who did from the total patients that survived to discharge for whom data was available.
- C7 “Dialysis”: DuBose et al.<sup>12</sup> reported on 2 patients who developed end-stage renal failure requiring dialysis as an inpatient.
- C8 “Deep Vein Thrombosis”: DuBose et al.<sup>12</sup> reported on 2 patients who developed a DVT.

### Chance Nodes D

- D1, D3, D5, D7, D9, D11, D13 “Survival”: Data on the survival following each of the complications was obtained from literature describing these complications in intensive care and major trauma patients, when possible. If there was no data describing mortalities in patients in these conditions then data was used from studies looking at the general population although this represents a limitation of our study.
- D2, D4, D6, D8, D10, D12, D14 “Death”: Mortality was obtained by subtracting the survival rates from 1.

### Chance Nodes E

- E1 “Discharged with dialysis”: Morris et al.<sup>46</sup> reported that patients who required dialysis after major trauma required long-term dialysis in 18% of cases. It was assumed that this was haemodialysis.

- E2 “Discharged without dialysis”: This represents the remaining 82% of patients who did not require haemodialysis long-term.

## RTACC Probabilities

Sources of all the data are delineated in Table S2.

### Chance Node A (intervention, Death)

- The “Definitive Intervention” node values were calculated using the rates of patients undergoing RTACC as an intervention, who had data for mortality before arriving at the operating room (OR). Once the rates were found, these were converted into probabilities. The natural log calculations yielded the same values over the one-year study period.
- “Death” values were found by taking away the probability of getting to the OR from 1.

### Chance Node B (Survival, Death)

- The “survival” patients were those who arrived to the OR and survived either a laparotomy or angioembolisation procedure. The data for this was limited, included in only 3 studies.
- Those in the “death” category was the mortality rate of the patients undergoing procedures. This was calculated using the number of patients receiving an intervention divided by the were the number of patients who died in the studies with data available for this node.

### Chance Node C (Complications)

The rates of complications were assessed using only the values available in the studies reporting this variable. Many studies mentioned, but did not state the number of complications and were therefore excluded.

- C1 (No complications). “no complication” data was a composite of the other papers, once the incidence of complications was found, 1 take away the probabilities of other complications. In literature, the complication rates are reported to be 35%<sup>26</sup>, our rate of 34% is close to the literature values.
- C2 (Sepsis). “sepsis” was reported in one study of 40 patients.
- C3 (Reoperations). For RTACC, “reoperation” is seen in 7 patients across 2 studies, in a total population of 519.
- C4 (Pneumothorax). “Pneumothorax” was a rare complication, seen in 1 out of 39 patients.
- C5 (Haemothorax). “Haemothorax” was seen in 1 patient out of 68.
- C6 (Empyema). “Empyema” was seen in 1 patient in a study where there were only 6 procedures observed. It is likely that this is overstated due to the small sample patient population.
- C7 (Infection). “Infection” is a more common complication of a thoracotomy due to the invasive and roadside element of this procedure. It was seen in two patients in a study of 68.
- C8 (Neurological Impairment). As the occlusion of the aorta limits blood flow to the brain “neurological impairment” was the most common complication observed and seen in 6 studies and one of the foci of the meta-analysis. In total, 29 patients survived with neurological impairment.

### Chance Node D (survival, death)

- D1, D2, D3, D4, D5, D6, D7, D8, D9, D10, D11, D12. All these values were obtained from literature. The mortality rates were converted into probabilities to find the chance of dying. In order to get the “survival” node, the mortality probability was subtracted from 1. Those undergoing reoperation were assumed to have the same survival probability as those previously undergoing surgery, as is would be for the same procedure.

## Sensitivity Analysis

The purpose of a sensitivity analysis is to assess the level of uncertainty in the model we created and whether changes in the data used impacted the overall probabilities, costs or utilities of each intervention as well as the overall ICER. The node column indicates which branch of the decision tree the calculation impacts, the categories where split for simplification of display. The variable column indicates the original value at the node identified from the first column and the alternative value given from literature. Once the alternative values had been inputted, we monitored the impact of this on the overall cost and utility of the REBOA or RTACC branch. Finally, these values were put into the ICER formula to demonstrate changes from the initial values. If the alternative value gave an overall ICER of less than £30,000 (the NHS' willingness-to-pay), then the alternative value was deemed to be cost-effective.

Table S4: Sensitivity analysis to determine impact of probability, cost and utility on ICER

| Node                  | Category    | Descriptor                                                                                  | Variable    |             | Δ Costs (£) |             | Δ Utility (QALY) |             | ICER (£/QALY) |             |          | Cost effective? |
|-----------------------|-------------|---------------------------------------------------------------------------------------------|-------------|-------------|-------------|-------------|------------------|-------------|---------------|-------------|----------|-----------------|
|                       |             |                                                                                             | Original    | Alternative | Original    | Alternative | Original         | Alternative | Original      | Alternative | % Change |                 |
|                       |             | <b>Survival at RTACC/REBOA</b>                                                              |             |             |             |             |                  |             |               |             |          |                 |
| RE(A1)                | Probability | Survival REBOA (min)                                                                        | 0.936       | 0.457       | 4575.45     | 1896.04     | 0.1025           | 0.0168      | 44617.4446    | 112800.02   | 152.82%  | no              |
|                       | Probability | Survival REBOA (max)                                                                        | 0.936       | 1.000       | 4575.45     | 4931.56     | 0.1025           | 0.1139      | 44617.4446    | 43280.63    | -3.00%   | no              |
| RT(A1)                | Probability | Survival RTACC (min)                                                                        | 0.522       | 0.000       | 4575.45     | 7577.46     | 0.1025           | 0.1673      | 44617.4446    | 45283.74    | 1.49%    | no              |
|                       | Probability | Survival RTACC (max)                                                                        | 0.522       | 1.000       | 4575.45     | 1824.23     | 0.1025           | 0.0432      | 44617.4446    | 42250.89    | -5.30%   | no              |
|                       |             | <b>Survival at Definitive Intervention</b>                                                  |             |             |             |             |                  |             |               |             |          |                 |
| RE(B1)                | Probability | Survival REBOA (min)                                                                        | 0.294       | 0.162       | 4575.45     | 4238.76     | 0.1025           | 0.0291      | 44617.4446    | 145803.47   | 226.79%  | no              |
|                       | Probability | Survival REBOA (max)                                                                        | 0.294       | 1.000       | 4575.45     | 6377.73     | 0.1025           | 0.4959      | 44617.4446    | 12861.79    | -71.17%  | yes             |
| RT(B1)                | Probability | Survival RTACC (min)                                                                        | 0.173       | 0.095       | 4575.45     | 4611.46     | 0.1025           | 0.1308      | 44617.4446    | 35262.26    | -20.97%  | no              |
|                       | Probability | Survival RTACC (max)                                                                        | 0.173       | 0.344       | 4575.45     | 4496.37     | 0.1025           | 0.0406      | 44617.4446    | 110808.90   | 148.35%  | no              |
|                       |             | <b>Complications</b>                                                                        |             |             |             |             |                  |             |               |             |          |                 |
| RE(C6)                | Probability | No complications REBOA (min)                                                                | 0.545       | 0.000       | 4575.45     | 5475.67     | 0.1025           | 0.0632      | 44617.4446    | 86643.39    | 94.19%   | no              |
|                       | Probability | No complications REBOA (max)                                                                | 0.545       | 1.000       | 4575.45     | 3825.25     | 0.1025           | 0.1353      | 44617.4446    | 28263.94    | -36.65%  | yes             |
| RT(C1)                | Probability | No complications RTACC (min)                                                                | 0.780       | 0.000       | 4575.45     | 4295.12     | 0.1025           | 0.1085      | 44617.4446    | 39590.62    | -11.27%  | no              |
|                       | Probability | No complications RTACC (max)                                                                | 0.780       | 1.000       | 4575.45     | 4655.54     | 0.1025           | 0.1009      | 44617.4446    | 46162.44    | 3.46%    | no              |
|                       |             | <b>ISS</b>                                                                                  |             |             |             |             |                  |             |               |             |          |                 |
| RE(A1,A2) & RT(A1,A2) | Cost        | REBOA/RTACC (min)                                                                           | 9487.00     | 7272.00     | 4575.45     | 4579.07     | 0.1025           | 0.1025      | 44617.4446    | 44652.76    | 0.08%    | no              |
|                       | Cost        | REBOA/RTACC (max)                                                                           | 9487.00     | 14280.00    | 4575.45     | 4567.61     | 0.1025           | 0.1025      | 44617.4446    | 44541.03    | -0.17%   | no              |
|                       |             | <b>Blood Products</b>                                                                       |             |             |             |             |                  |             |               |             |          |                 |
| RE(A1,A2)             | Cost        | REBOA (min)                                                                                 | 18.60       | 12.00       | 4575.45     | 3493.81     | 0.1025           | 0.1025      | 44617.4446    | 34069.84    | -23.64%  | no              |
|                       | Cost        | REBOA (max)                                                                                 | 18.60       | 28.80       | 4575.45     | 6247.07     | 0.1025           | 0.1025      | 44617.4446    | 60918.28    | 36.53%   | no              |
| RT(A1,A2)             | Cost        | RTACC (min)                                                                                 | 11.30       | 9.00        | 4575.45     | 4953.34     | 0.1025           | 0.1025      | 44617.4446    | 48302.44    | 8.26%    | no              |
|                       | Cost        | RTACC (max)                                                                                 | 11.30       | 28.60       | 4575.45     | 1733.06     | 0.1025           | 0.1025      | 44617.4446    | 16899.88    | -62.12%  | yes             |
|                       |             | <b>Proportion Angio:Lap</b>                                                                 |             |             |             |             |                  |             |               |             |          |                 |
| RE(A1)                | Cost        | REBOA (min)                                                                                 | 0.474 Angio | 0 Angio     | 4575.45     | 5817.63     | 0.1025           | 0.1025      | 44617.4446    | 56730.58    | 27.15%   | no              |
|                       | Cost        | REBOA (max)                                                                                 | 0.474 Angio | 1 Angio     | 4575.45     | 3196.99     | 0.1025           | 0.1025      | 44617.4446    | 31175.44    | -30.13%  | no              |
| RT(A1)                | Cost        | RTACC (min)                                                                                 | 0.167 Angio | 0 Angio     | 4575.45     | 4331.10     | 0.1025           | 0.1025      | 44617.4446    | 42234.76    | -5.34%   | no              |
|                       | Cost        | RTACC (max)                                                                                 | 0.167 Angio | 0.273 Angio | 4575.45     | 4730.54     | 0.1025           | 0.1025      | 44617.4446    | 46129.81    | 3.39%    | no              |
|                       |             | <b>Survey QoL Values</b>                                                                    |             |             |             |             |                  |             |               |             |          |                 |
| RE(A1) & RT(A1)       | Utility     | ITU - REBOA/RTACC (min)                                                                     | 0.286       | 0.169       | 4575.45     | 4575.45     | 0.1025           | 0.1019      | 44617.4446    | 44904.24    | 0.64%    | no              |
|                       | Utility     | ITU - REBOA/RTACC (max)                                                                     | 0.286       | 0.335       | 4575.45     | 4575.45     | 0.1025           | 0.1028      | 44617.4446    | 44498.42    | -0.27%   | no              |
| RT(C4)                | Utility     | Pneumothorax (min)                                                                          | 0.237       | -0.126      | 4575.45     | 4575.45     | 0.1025           | 0.1026      | 44617.4446    | 44616.31    | 0.00%    | no              |
|                       | Utility     | Pneumothorax (max)                                                                          | 0.237       | 0.592       | 4575.45     | 4575.45     | 0.1025           | 0.1025      | 44617.4446    | 44618.55    | 0.00%    | no              |
| RT(C6)                | Utility     | Empyema (min)                                                                               | 0.233       | -0.199      | 4575.45     | 4575.45     | 0.1025           | 0.1026      | 44617.4446    | 44613.17    | -0.01%   | no              |
|                       | Utility     | Empyema (max)                                                                               | 0.233       | 0.531       | 4575.45     | 4575.45     | 0.1025           | 0.1025      | 44617.4446    | 44620.40    | 0.01%    | no              |
| RT(C5)                | Utility     | Haemothorax (min)                                                                           | 0.237       | -0.126      | 4575.45     | 4575.45     | 0.1025           | 0.1026      | 44617.4446    | 44616.35    | 0.00%    | no              |
|                       | Utility     | Haemothorax (max)                                                                           | 0.237       | 0.592       | 4575.45     | 4575.45     | 0.1025           | 0.1025      | 44617.4446    | 44618.52    | 0.00%    | no              |
|                       |             | Note: Values in the table are rounded for display purposes. Therefore, they may not add up. |             |             |             |             |                  |             |               |             |          |                 |





## Discussion

Table S5 - List of assumptions used in study

| Assumption                                     | Rationale for assumption                                                                                                                                                                                                                                                                                                                                                                                     | Source (if applicable) |
|------------------------------------------------|--------------------------------------------------------------------------------------------------------------------------------------------------------------------------------------------------------------------------------------------------------------------------------------------------------------------------------------------------------------------------------------------------------------|------------------------|
| <b>Length of ventilation/ICU/hospital stay</b> | No sufficient data from studies on the overall length of stay, length of stay in ICU and duration and rate of use of invasive ventilation. Therefore, this analysis relied on data from this large UK study                                                                                                                                                                                                  | Campbell <sup>39</sup> |
| <b>TISS-28 Score</b>                           | This score was calculated for a typical patient estimated by our group to reach the tariff for major trauma                                                                                                                                                                                                                                                                                                  | Lefering <sup>49</sup> |
| <b>Conscious level</b>                         | Due to incomplete reporting of this measure all patients were assumed to be unconscious and intubated and ventilated by the time or during their A&E management.                                                                                                                                                                                                                                             | N/A                    |
| <b>Dialysis post-discharge</b>                 | Most dialysis regimens in the UK involve 3 sessions per week. It was assumed this was the case for our patients                                                                                                                                                                                                                                                                                              | Fluck <sup>50</sup>    |
| <b>In-Hospital Dialysis</b>                    | It was assumed that dialysis was required only during intensive care stay, when a patient is sickest and where the facilities for dialysis are available, and at the same rate as outpatient dialysis                                                                                                                                                                                                        | N/A                    |
| <b>Procedure location</b>                      | It was assumed every REBOA/RTACC was performed in a major trauma centre                                                                                                                                                                                                                                                                                                                                      | N/A                    |
| <b>Pre-hospital costs</b>                      | Pre-hospital costs were excluded because they are identical to both patient sets. It can be assumed that some patients were transported using air ambulances whilst others would be transported using conventional road ambulances. The different probabilities of both patient sets using either of these methods of transport could have impacted on the results but there was insufficient data for this. | N/A                    |
| <b>ICU care</b>                                | The tariff for ICU stay is agreed locally and is conditional on the number of organs supported. It was unknown how many organs were supported in each patient therefore this was eliminated from the costing altogether.                                                                                                                                                                                     | N/A                    |

|                                                       |                                                                                                                                                                                                                                                                                                                                                                                  |                                                                          |
|-------------------------------------------------------|----------------------------------------------------------------------------------------------------------------------------------------------------------------------------------------------------------------------------------------------------------------------------------------------------------------------------------------------------------------------------------|--------------------------------------------------------------------------|
| <b>Pneumothorax, Haemothorax, Empyema</b>             | It was assumed all these complications occurred after ICU stay and took 5 days to resolve, except for empyema which took the full duration of general medical ward stay.                                                                                                                                                                                                         |                                                                          |
| <b>Utilities derived from questionnaire</b>           | A questionnaire was undertaken with experienced medical professionals to reach to the utility of being in ICU, empyema, pneumothorax and haemothorax. No data was available on the utilities for these health states in the literature.                                                                                                                                          |                                                                          |
| <b>Time of death</b>                                  | Patients who died are assumed to have survived to the end of the standardised admission as there was extremely sparse data on length of stay.                                                                                                                                                                                                                                    |                                                                          |
| <b>Utility Ventilation</b>                            | Assumed to be 0. Patients are unconscious and the health state is equivalent to being dead.                                                                                                                                                                                                                                                                                      |                                                                          |
| <b>Utility Neurological Impairment</b>                | There was no uniform definition in the literature on what the neurological outcomes were of those who suffered impairment. Therefore, it was assumed that the utility was the same as that of patient suffering from an ischaemic stroke.                                                                                                                                        | Xie <sup>40</sup>                                                        |
| <b>Utility Sepsis</b>                                 | Data using EQ-5D on the utility after severe sepsis in critical illness, our subset of patients, was derived from a study looking at this utility at 2 years. No available study was found using EQ-5D at 1 year or earlier that gave a concrete number. It was assumed that this utility would be the same from discharge, similar to what Brown (2007) assumed in their paper. | Korosec <sup>41</sup>                                                    |
| <b>Mortality Thrombosis Lower limb amputation DVT</b> | Mortality for these three complications were not obtained for patients specific to major trauma. Evidence for patients in general was used. This is likely to understate the mortality as trauma patients are likely to be more unwell.                                                                                                                                          | Fortington <sup>36</sup> ; Lyaker <sup>33</sup> ; Galanaud <sup>34</sup> |
| <b>Mortality AKI</b>                                  | It was assumed nobody died within a year after admission with acute kidney injury. This was because the severity of the injury was low and no patient suffered any adverse outcome as a result. Patients with severe renal failure, requiring haemodialysis, were modelled separately                                                                                            |                                                                          |

|                               |                  |                                                                                                                                                                                                                                                                |                             |
|-------------------------------|------------------|----------------------------------------------------------------------------------------------------------------------------------------------------------------------------------------------------------------------------------------------------------------|-----------------------------|
| <b>Mortality infection</b>    | <b>localised</b> | <p>Two instances of localized infection at the site of thoracotomy were reported. None developed into sepsis. This was managed through a minor procedure. Therefore, it was assumed that this carries a mortality of 0.</p>                                    | <p>DuBose <sup>12</sup></p> |
| <b>Utility of reoperation</b> |                  | <p>As this is due to a re-bleed from the initial intervention and likely to occur within hours of being operated on initially, the utility is that of being ventilated, as this is the health state at the time. It was costed as a further major surgery.</p> |                             |
| <b>Blood products</b>         |                  | <p>It was assumed that only red blood cells were used. Only a very small amount of studies reported on the use of blood products other than red blood cells, therefore it was only quantified and costed for this use.</p>                                     |                             |

## References

1. Low RB, Longmore W, Rubinstein R, et al. Preliminary report on the use of the percluder® occluding aortic balloon in human beings. *Annals of Emergency Medicine* 1986; 15 (12); 1466–1469.
2. Wolf RK, and Berry RE. Transaxillary intra-aortic balloon tamponade in trauma. *Journal of Vascular Surgery* 1986; 4 (1); 95–97.
3. Gupta BK, Khaneja SC, Flores L, et al. The role of intra-aortic balloon occlusion in penetrating abdominal trauma. *Journal of Trauma and Acute Care Surgery* 1989; 29 (6); 861–865.
4. Matsuoka S, Uchiyama K, Shima H, et al. Temporary percutaneous aortic balloon occlusion to enhance fluid resuscitation prior to definitive embolization of post-traumatic liver hemorrhage. *Cardiovascular and interventional radiology* 2001; 24 (4); 274–276.
5. Martinelli T, Thony F, Decléty P, et al. Intra-aortic balloon occlusion to salvage patients with life-threatening hemorrhagic shocks from pelvic fractures. *Journal of Trauma and Acute Care Surgery* 2010; 68 (4); 942–948.
6. Brenner ML, Moore LJ, DuBose JJ, et al. A clinical series of resuscitative endovascular balloon occlusion of the aorta for hemorrhage control and resuscitation. *Journal of Trauma and Acute Care Surgery* 2013; 75 (3); 506–511.
7. Ogura T, Lefor AT, Nakano M, et al. Nonoperative management of hemodynamically unstable abdominal trauma patients with angioembolization and resuscitative endovascular balloon occlusion of the aorta. *Journal of Trauma and Acute Care Surgery* 2015; 78 (1); 132–135.
8. Irahara T, Sato N, Moroe Y, et al. Retrospective study of the effectiveness of Intra-Aortic Balloon Occlusion (IABO) for traumatic haemorrhagic shock. *World Journal of Emergency Surgery* 2015; 10 (1); 1.
9. Norii T, Crandall C. and Terasaka Y. Survival of severe blunt trauma patients treated with resuscitative endovascular balloon occlusion of the aorta compared with propensity score-adjusted untreated patients. *Journal of Trauma and Acute Care Surgery* 2015; 78 (4); 721–728.
10. Saito N, Matsumoto H, Yagi T, et al. Evaluation of the safety and feasibility of resuscitative endovascular balloon occlusion of the aorta. *Journal of Trauma and Acute Care Surgery* 2015; 78 (5); 897–904.
11. Moore LJ, Brenner M, Kozar RA, et al. Implementation of resuscitative endovascular balloon occlusion of the aorta as an alternative to resuscitative thoracotomy for noncompressible truncal hemorrhage. *Journal of Trauma and Acute Care Surgery* 2015; 79 (4); 523–532.
12. DuBose JJ, Scalea TM, et al. The AAST Prospective Aortic Occlusion for Resuscitation in Trauma and Acute Care Surgery (AORTA) Registry: data on contemporary utilization and outcomes of aortic occlusion and resuscitative balloon occlusion of the aorta (REBOA). *Journal of Trauma and Acute Care Surgery* 2016; 81 (3); 409–419.
13. Branney S, Moore E, Feldhaus K, et al. Critical analysis of two decades of experience with postinjury emergency department thoracotomy in a regional trauma center. *Journal of Trauma and Acute Care Surgery* 1998; 45 (1); 87–94.
14. Velmahos G, Degiannis E, Souter I, et al. Outcome of a strict policy on emergency department thoracotomies. *Archives of Surgery Journal Impact & Description* 1995; 30 (7); 774–777.
15. Durham L, Richardson R, Wall MJ, et al. Emergency center thoracotomy: impact of prehospital resuscitation. *Journal of Trauma and Acute Care Surgery* 1992; 32775–779.
16. Ivatory R, Kazigo J, Rohman M, et al. 'Directed' Emergency Room Thoracotomy: A Prognostic Prerequisite for Survival. *Journal of Trauma-Injury Infection & Critical Care* 1991; 31 (8); 1076–1082.
17. Feliciano DV, Bitondo CG, Cruse PA, et al. Liberal use of emergency center thoracotomy. *The American Journal of Surgery* 1986; 152 (6); 654–659.
18. Schwab C, Adcock O, and Max M. Emergency department thoracotomy (EDT). A 26-month experience using an 'agonal' protocol. *The American Journal of Surgery* 1986; 52 (1); 20–29.
19. Danne P, Finelli F and Champion H. Emergency bay thoracotomy. *Journal of Trauma and Acute Care Surgery* 1984; 24 (9); 796–802.
20. Vij D, Simoni E, Smith R, et al. Resuscitative thoracotomy for patients with traumatic injury. *Surgery* 1983; 94 (4); 554–561.
21. Flynn T, Ward R, and Miller P. Emergency room thoracotomy. *Annals of Emergency Medicine* 1982; 11413–416.
22. MacDonald JR and McDowell RM. Emergency department thoracotomies in a community hospital. *Journal of the American College of Emergency Physicians* 1978; 7 (12); 423–428.
23. Millikan JS, and Moore EE. Outcome of resuscitative thoracotomy and descending aortic occlusion performed in the operating room. *Journal of Trauma and Acute Care Surgery* 1984; 24 (5); 387–392.
24. Van Waes OJF, Van Riet PA, Van Lieshout, EMM, et al. Immediate thoracotomy for penetrating injuries: ten years' experience at a Dutch level I trauma center. *European Journal of Trauma and Emergency Surgery* 2012; 38 (5); 543–551.
25. Lorenz HP, Steinmetz B, Lieberman J, et al. Emergency thoracotomy: survival correlates with physiologic status. *Journal of Trauma and Acute Care Surgery* 1992; 32 (6); 780–788.
26. Abe T, Uchida M, Nagata I, et al. Resuscitative endovascular balloon occlusion of the aorta versus aortic cross clamping among patients with critical trauma: a nationwide cohort study in Japan. *Critical Care* 2016; 20; 400.
27. Seamon MJ, Haut, ER, Van Arendonk K, et al. An evidence-based approach to patient selection for emergency department thoracotomy: a practice management guideline from the Eastern Association for the Surgery of Trauma. *Journal of Trauma and Acute Care Surgery* 2015; 79 (1); 159–173.
28. Brautigan, MW. and Tietz, G. Emergency thoracotomy in an urban community hospital: Initial cardiac rhythm as a new predictor of survival. *The American journal of emergency medicine* 1985; 3 (4): 311–315.
29. Seamon MJ, Pathak AS, Bradley KM, et al. Emergency department thoracotomy: still useful after abdominal exsanguination? *Journal of Trauma and Acute Care Surgery* 2008; 64 (1); 1–8.
30. Seamon MJ, Fisher CA, Gaughan JP, Kulp H, et al. Emergency department thoracotomy: survival of the least expected. *World Journal of Surgery* 2008; 32 (4); 604–612.
31. Ledgerwood AM, Kazmers M, and Lucas CE. The role of thoracic aortic occlusion for massive hemoperitoneum. *Journal of Trauma and Acute Care Surgery* 1976; 16 (8); 610–615.
32. Sprengers RW, Teraa M, Moll FL, et al. Quality of life in patients with no-option critical limb ischemia underlines the need for new effective treatment. *Journal of Vascular Surgery* 2010; 52 (4); 843–849.
33. Lyaker MR, Tulman DB, Dimitrova GT et al. Arterial embolism. *International Journal of Critical Illness and Injury Science* 2013; 3 (1); 77–87.
34. Galanaud JP, Sevestre-Pietri MA, Bosson JL et al. Comparative study on risk factors and early outcome of symptomatic distal versus proximal deep vein thrombosis: results from the OPTIMEV study. *Thrombosis and haemostasis* 2009; 102493–500.
35. Tennvall GR and Apelqvist J. Health-related quality of life in patients with diabetes mellitus and foot ulcers. *Journal of Diabetes and its Complications* 2000; 14 (5); 235–241.
36. Fortington LV, Geertzen JHB, van Netten JJ, et al. Short and long term mortality rates after a lower limb amputation. *European Journal of Vascular and Endovascular Surgery* 2013; 46 (1); 124–131.

37. Fagon JY, Chastre J, Vuagnat A, et al. Nosocomial pneumonia and mortality among patients in intensive care units. *Jama*. 1996; 275 (11); 866–869.
38. Ringburg AN, Polinder S, van Ierland MCP, et al. Prevalence and prognostic factors of disability after major trauma. *Journal of Trauma and Acute Care Surgery* 2011; 70 (4); 916–922.
39. Campbell HE, Stokes EA, Bargo DN, et al. Quantifying the healthcare costs of treating severely bleeding major trauma patients: a national study for England. *Critical Care* 2015; 19 (1); 276.
40. Xie, J, Wu EQ, Zheng ZJ, et al. (2006) Impact of stroke on health-related quality of life in the noninstitutionalized population in the United States. *Stroke* 2006; 37 (10); 2567–2572.
41. Korošec H, Jagodič K, and Podbregar M. Long-term outcome and quality of life of patients treated in surgical intensive care: a comparison between sepsis and trauma. *Critical Care* 2006; 10 (5); 134.
42. Granja C, Dias C, Costa-Pereira A. and Sarmento, A. Quality of life of survivors from severe sepsis and septic shock may be similar to that of others who survive critical illness. *Critical Care*. 2004; 8 (2); 91.
43. Griffith GL, Todd EP, McMillin, RD, et al. Acute traumatic hemothorax. *The Annals of Thoracic Surgery* 1978; 26 (3); 204–207.
44. Yoon JS, Choi SY, Suh JH, et al. (2013) Tension pneumothorax, is it a really life-threatening condition? *Journal of Cardiothoracic Surgery* 2013; 8 (1); 197.
45. Sogaard M, Nielsen R B, Nørgaard M, et al. Incidence, length of stay, and prognosis of hospitalized patients with pleural empyema: a 15-year Danish nationwide cohort study. *Chest* 2014; 145 (1); 189-92.
46. Morris JA, Mucha P, Ross, SE, et al. Acute posttraumatic renal failure: a multicenter perspective. *Journal of Trauma and Acute Care Surgery* 1991; 31 (12); 1584–1590.
47. Nisula, S., Vaara ST, Kaukonen KM, et al. Six-month survival and quality of life of intensive care patients with acute kidney injury. *Critical Care*. 2013; 17 (5); 250.
48. NICE. Costing statement: Blood transfusion Implementing the NICE guideline on blood transfusion (NG24). <https://www.nice.org.uk/guidance/ng24/resources/costing-statement-2177158141>. (2015, accessed 1 March 2017).
49. Lefering R, Zart M, and Neugebauer EAM. Retrospective evaluation of the simplified Therapeutic Intervention Scoring System (TISS-28) in a surgical intensive care unit. *Intensive Care Medicine* 2000; 26 (12); 1794-1802.
50. Fluck RJ, Fouque D, and Lockridge RS. Nephrologists' perspectives on dialysis treatment: results of an international survey. *BMC Nephrology* 2014; 15 (1); 16.
